# Evidence for the Involvement of Vernalization-related Genes in the Regulation of Cold-induced Ripening in 'D'Anjou' and 'Bartlett' Pear Fruit

Seanna Hewitt<sup>1,3</sup>, Christopher A. Hendrickson<sup>2</sup>, and Amit Dhingra<sup>1,3\*</sup>

1 Molecular Plant Sciences, Washington State University, Pullman, Washington

2 National University, La Jolla, California

3 Department of Horticulture, Washington State University, Pullman, Washington

\*Corresponding author: [adhingra@wsu.edu](mailto:adhingra@wsu.edu)

## Abstract

European pear (*Pyrus communis* L.) cultivars require a genetically pre-determined duration of cold-temperature exposure to induce autocatalytic system 2 ethylene biosynthesis and subsequent fruit ripening. The physiological responses of pear to cold-temperature-induced ripening have been well characterized, but the molecular mechanisms underlying this phenomenon continue to be elucidated. This study employed established cold temperature conditioning treatments for ripening of two pear cultivars, 'D'Anjou' and 'Bartlett'. Using a time-course transcriptomics approach, global gene expression responses of each cultivar were assessed at four different developmental stages during the cold conditioning process. Differential expression, functional annotation, and gene ontology enrichment analyses were performed. Interestingly, evidence for the involvement of cold-induced, vernalization-related genes and repressors of endodormancy release was found. These genes have not previously been described to play a role in fruit during the ripening transition. The resulting data provide insight into cultivar-specific mechanisms of cold-induced transcriptional regulation of ripening in European pear, as well as a unique comparative analysis of the two cultivars with very different cold conditioning requirements.

## Introduction

Pear (*Pyrus spp.*) is an economically important and nutritionally valuable tree fruit genus worldwide. European pear (*Pyrus communis L.*) cultivars are among the most widespread, commercially grown *Pyrus* members, and are cultivated in Europe, North America, South America, Africa, and Australia [1]. Along with apples, bananas, peaches, tomatoes, mangoes, and avocados, European pear is classified as climacteric in its ripening profile. Ripening in most climacteric fruits involves a seamless transition between system 1 (S1) and system 2 (S2) ethylene production. This is the point at which regulation of ethylene synthesis changes from autoinhibitory to auto-stimulatory [2, 3]. Increased ethylene biosynthesis during climacteric ripening is accompanied by a concomitant spike in respiration [2, 4, 5]. A prominent aspect that distinguishes European pear and Chinese white pear (*Pyrus bretschneideri* Rehder.) from most other climacteric fruits is that these species have a pre-ripening period during which they require a specific amount of cold exposure in order to transition from S1 to S2 ethylene production [6] [7]. The process of cold exposure is called ‘conditioning’ and accumulation of chilling hours necessary for this transition, and therefore ripening initiation, is referred to as the ‘chilling requirement’ [8].

The chilling requirement for ripening varies by cultivar. ‘Bartlett’ pears require 15 days of chilling, ‘Comice’ require 30, and ‘D’Anjou’ require 60 days of chilling at 0°C. ‘Passe Crassane’ pears lie at the extreme end of the conditioning spectrum, with a requirement of 90 days of chilling at 0°C to ripen. However, the duration of chilling may be manipulated by increasing the temperature at which conditioning is conducted, with an appropriate temperature range of 0-15°C [8]. In addition to genetic predetermination for chilling duration, chilling time is affected by maturity of the fruit at harvest, with pears harvested at a greater maturity index requiring a less extensive period of cold conditioning, and vice versa [9].

Physiological studies have characterized the conditioning requirements for a range of European pear cultivars under defined conditioning temperatures, exogenous ethylene application regimes, and other pre-harvest treatments [8-11]. While exogenous ethylene treatment reduces cold conditioning needs, in most European pear cultivars it does not entirely compensate for the need of cold conditioning. This indicates that cold-dependent mechanisms are partly responsible for regulating the development of ripening competency, which in turn impacts the quality and marketability of pear fruit. Interestingly, in contrast to *P. communis* and *P. bretschneideri*, many Japanese pear (*Pyrus pyrifolia L.*) varieties have no conditioning requirements and are also regarded as non-climacteric fruits because they do not display the characteristic S1 to S2 transition during ripening [12]. Additionally, ‘Bosc’, unique from other European pear cultivars, acquires competency for ripening with exogenous ethylene only, needing no chilling to ripen [8].

Requirement of cold exposure in pear to induce ripening is reminiscent of other natural cold temperature-dependent developmental phenomena, such as the vernalization and stratification that are needed for flowering and seed germination, respectively. The genes that regulate vernalization and stratification have been well-studied in model organisms, including *Arabidopsis*, wheat, and barley [13-15]; however, similar gene homologues have not yet been reported in cold-induced fruit ripening. With respect to flowering, the process of developmental

initiation following an environmentally governed dormant state is known as endodormancy release [16]. Thus far, endodormancy release has not been used to characterize ripening after chilling, although the two processes share many similarities with regards to the timing and environmental nature of cold required, suggesting that similar genetic and regulatory mechanisms may govern these processes. Various forms of the chilling requirement for ripening have been described in avocado and mango, although to a lesser degree than in pear, as the former are more prone to chilling injury [17, 18].

Few recent studies have utilized a transcriptomics approach to characterize the molecular underpinnings of cold-induced S1 to S2 transition in Pear. There is a complex interaction of genes involved in regulating phytohormones, secondary messengers, signaling pathways, respiration and chromatin modification that underlie cold-induced progression of ripening [19-24]. Genes associated with phytohormones such as abscisic acid (ABA), auxin, and jasmonic acid along with transcription factors were implicated in low-temperature-mediated enhancement of ripening in ‘Bartlett’ [22]. In ‘Passe Crassane’ the impact of low temperature (LT) induced ethylene and exogenous ethylene treatments were evaluated using a transcriptomics approach [25]. It was observed that the expression of a subset of the low temperature-induced differentially expressed genes was disrupted by 1-MCP treatment indicating that they were regulated by LT-induced ethylene. It was also reported that several transcription factors were unaffected by 1-MCP treatment, implying that they were under the control of LT alone [25]. Recent work quantifying expression of key genes representing ripening-related metabolic pathways in ‘D’Anjou’ and ‘Bartlett’ pear cultivars during the process of cold-conditioning, revealed an increased alternative oxidase (AOX) expression prior to the onset of the ripening climacteric. This novel finding suggests that AOX may play an important role in the achievement of ripening competency [26] and may be necessary for the onset of the ripening climacteric in pear and other chilling dependent fruit. The Alternative Oxidase (AOX) respiratory pathway is known to play a role in cold stress mediation and response in many plant systems including cold temperature induced activation of respiration in potatoes, cell expansion and elongation in cotton, and mitigation of chilling injury in tomato and chickpea [27-29]. In many plant systems, AOX activity serves to maintain carbon metabolism homeostasis, cellular redox state, and ROS homeostasis during development [30].

Based on our previous work [26], a time course RNAseq analysis was performed in this study using ‘Bartlett’ and ‘D’Anjou’ fruit to evaluate the hypothesis that AOX and other key cold-induced genes facilitate ripening, and that the fruit from the two cultivars recruit different set of genes during cold conditioning. Key genes and networks involved in cold-induced, ripening-associated biochemical pathways were identified.

## **Results and Discussion**

### **Fruit Firmness**

Tissues from the fruit used in Hendrickson, Hewitt (31) were utilized for RNAseq analysis conducted in this study. Cold conditioning of the fruit at 10°C resulted in a reduction of fruit firmness in both ‘Bartlett’ and ‘D’Anjou’ cultivars as demonstrated (see Figure 2 in [31]).

For both cultivars, fruit softening accelerated once the fruit was transferred to 20°C. The rate of softening was more rapid for ‘Bartlett’ than ‘D’Anjou’.

## **RNAseq Assembly Analysis**

RNAseq assembly generated 140077 contigs (Supplementary File 1). In the OmicsBox suite, the maSigPro R package was used to conduct time course differential expression analyses for both cultivars. 17,711 differentially expressed contigs ( $p < 0.05$ ) were identified for ‘D’Anjou’, with 7,174 of these contigs exhibiting significant linear or quadratic trends over time ( $R > 0.8$ ). In ‘Bartlett’ 31,481 contigs were identified as being differentially expressed, with 7,174 contigs exhibiting significant quadratic or linear trends over time ( $R > 0.8$ ) (Supplementary File 2). Similarities and differences in expression trends of contigs of interest between ‘D’Anjou’ and ‘Bartlett’, as well as expression patterns of differentially expressed contigs (DECs) associated with ethylene and phytohormone metabolism, abscisic acid metabolism, TCA cycle, respiration, were assessed. Additionally, in order to better understand the mechanisms underlying the chilling requirement for ripening in *Pyrus*, the expression of genes associated with: vernalization, flowering, dormancy, and other processes directly induced by cold/chilling were observed. Pre-climacteric expression of *AOX1* peaked during conditioning prior to onset of ripening (Figure 1), supporting the hypothesis. Additional key genes, including those that mediate vernalization and endodormancy release were also observed to be differentially expressed. Detailed analysis of RNAseq results and enriched gene ontologies related to phytohormone metabolism and cold-response pathways are discussed in detail in the following sections.

## **Alternative Oxidase**

Confirming previous observation, pre-climacteric activation of alternative respiratory pathway transcription was observed during conditioning. Two DECs corresponding to mitochondrial ubiquinol oxidases, homologs of *AOX1*, displayed an increase in expression trend consistent with a preceding report where pre-climacteric increase in *AOX1* was observed as the fruit completed its conditioning requirement [26] (Figure 1). *AOX1* gene expression has been reported in many fruit systems, however mostly at climacteric or post-climacteric stages, with *AOX* isoforms displaying responses to a broad range of stresses. The different expression patterns of the two *AOX* contigs corresponding to ‘D’Anjou’ and ‘Bartlett’ suggests that *AOX* isoforms differentially regulate responses in different genetic backgrounds. The variable actions of *AOX* homologues on biological processes has been previously observed in Arabidopsis and tomato [32, 33]. Knock-down of *AOX* in tomato delayed ripening, indicating a regulatory role of *AOX* in fundamental processes like ethylene response. Furthermore, overexpression of *AOX* in tomato alleviated some of the inhibitory effects of 1-MCP on ripening [34]. In European pear, respiratory partitioning into the alternative pathway may impact S2 ethylene biosynthesis, the climacteric respiration peak, and consequent ripening-related trait development, independent of prior ethylene sensitivity [26, 34, 35].

## **Ethylene**

For both cultivars, abundance of many transcripts associated with ethylene biosynthesis, perception, and signaling increased throughout the conditioning and ripening period in

agreement with similar previous studies [22, 25]. *ACO1* and *ACSI1*, were significantly differentially expressed and increased in expression throughout the duration of the conditioning time course in both ‘D’Anjou’ and ‘Bartlett’, as did *RAN1*, which delivers a copper ion that is necessary for ethylene to bind to its receptors [10, 36-38].

Of particular interest in this study was expression pattern of ethylene repressors in response to cold. Consistent with results of recent studies in pear, a *MYB1R* transcription factor, a repressor of ethylene and ripening responses, decreased in expression once ripening competency was reached [21, 39] (Figure 2). Furthermore, brassinosteroid-associated *Brassinazole-Resistant 1 (BZR1)* and chromatin modification-associated *Multicopy Suppressor of IRA4 (MSI4)*, which have been shown to repress ethylene responses in banana and tomato, respectively, displayed different expression trends in the two cultivars. *BZR1* increased over time in ‘D’Anjou’ and decreased over time in ‘Bartlett’ [40] (Supplementary File 3). These observations may provide further insight into the cultivar specific nature of ripening in pear, as ‘D’Anjou’ is known to be inherently more recalcitrant to ripening [41]. The different ripening trajectories apparent from analysis in this study are congruent with the different vectors followed by the two cultivars in the recent study, which used NMDS analysis to evaluate the relationship between ripening and genes related to the process [26]. The different expression patterns of ethylene signaling genes during ripening suggest a more pronounced ethylene response in the ‘Bartlett’ cultivar, which may be associated with the shorter conditioning time, but perhaps a more complex and a different system of regulation in ‘D’Anjou’.

## **Abscisic Acid (ABA)**

ABA is well-established as a key regulator of timing of endodormancy release in both model and non-model organisms, such as pear [42, 43]. ABA-related DECs that displayed a similar increase in expression patterns over time for both cultivars included *9-cis-epoxycarotenoid dioxygenase (NCED1)*, which catalyzes the first step in ABA biosynthesis and regulates some genes associated with cell wall degradation during ripening [44]; *abscisic acid 8'-hydroxylase 2 (CYP707A)*, which is important for regulating seed dormancy and germination in Arabidopsis, accumulating over the course of seed maturation and resulting in the breakdown of ABA [45] (Figure 3). *CYP707A* has also been shown to inhibit the expression of *NCED-like* genes, thereby reducing ABA biosynthesis in strawberry and tomato [46]. *Abscisic-Aldehyde Oxidase (AAO)* related transcript displayed variable expression between the two cultivars (Figure 3). The concomitant increase in transcripts encoding these antagonistic enzymes suggests that increased ABA synthesis is paralleled by a simultaneous increase in the ABA degradation in a tug-of-war between endodormancy maintenance and release, where the latter is favored only when sufficient chilling has occurred.

In contrast to DECs displaying a continual increase in expression over time, *Abscisic Acid Insensitive 5 (ABI5)* displayed decreased expression in both cultivars during the second half of conditioning and ripening period. This gene is a negative regulator of flowering in Arabidopsis [47] and therefore may play a similar role in negative regulation of other endodormancy-associated processes including fruit ripening.

## **Sulfur metabolism**



Sulfur containing compounds, including hydrogen sulfide (H<sub>2</sub>S), enhance alternative pathway respiration and inhibit ROS production in fruits [48-51]. Such compounds have also been [50, 51] used in fruit processing as a preservation strategy to reduce oxidative browning [52], and low dose applications of H<sub>2</sub>S elicit a pronounced ripening response in pear fruit [53]. The sulfur metabolism genes, *ATP sulfurylase* and *ATP sulfurylase 2*, were highly expressed only in ‘Bartlett’, with transcript abundance increasing over the course of conditioning and ripening (Supplementary File 4). It is possible, given these results, that sulfur metabolism genes play a role in ripening in a cultivar specific manner.

## Cold and temperature stress-induced processes

In addition to phytohormone-associated genes, several genes and gene families that have previously been implicated in cold-induced endodormancy release and vernalization processes displayed similar expression patterns over time. Those increasing continually during cold conditioning for both cultivars included *Early Flowering 3 (EF3)*, which has been shown to maintain the circadian clock in a temperature-dependent manner in barley and Arabidopsis [54] (Figure 4). Upregulation of this regulatory gene in pear fruit exposed to chilling may result in induction of genes associated with release of endodormancy. *Polycomb group embryonic flower 2-like isoform x1 (EMF2)* decreased continually in expression during conditioning and ripening in ‘Bartlett’ (Supplementary File 5). In Arabidopsis, loss of function of EMF2 causes direct initiation of flowering, causing a bypass of vegetative shoot growth [55]. The isoform present in ‘Bartlett’ may play a similar role in modulating initiation of ripening.

Furthermore, a DEC corresponding to a BRCA1 homolog increased during conditioning. The *BRCA1* gene has homologues in humans, and BRCA mutations are most often associated with increased cancer susceptibility; however, the primary function of the gene is DNA damage repair and chromatin remodeling, and BRCA1 has been shown to play a similar reparatory role in plants [56, 57]. It is possible that BRCA1 in fruit, might play a role in mediating temperature-induced stress damage to DNA during cold conditioning. In addition to *BRCA1*, *Next-to-BRCA (NBR1)* displayed increasing expression during conditioning and ripening for both cultivars (Supplementary File 6). NBR1 plays a role in heat stress tolerance in Arabidopsis [58], although little work has been done to study its effects in other plants.

The vernalization-associated gene *VRNI*, has been characterized with regards to flowering time in both model and non-model species, specifically in the context of cold [15, 59]. In cereal grains transcriptional activation of *VRNI* after prolonged chilling results in accelerated flowering [60]. Interestingly, *VRNI* was significantly differentially expressed over time in ‘Bartlett’ during the accumulation of chilling hours, while expression levels remained low in ‘D’Anjou’ throughout the time course (Figure 4). In ‘Bartlett’ the observed patterns of expression of *VRNI* during conditioning are consistent with a previously described model in wheat, in which increased accumulation of *VRNI* transcripts correlates with a decreased repression of endodormancy release, primarily via repression of FLC-like genes and other developmental repressors [61, 62].

Another vernalization-associated gene, *VIN3* isoform x1, which is associated with temperature-mediated epigenetic regulation of endodormancy repressors [63], displayed

increasing expression in both cultivars during the cold conditioning period (Figure 4). As VIN3 and VRN1 are both cold-induced repressors of endodormancy release and are expressed differently in ‘D’Anjou’ and ‘Bartlett’, the opposite, genotypic-specific expression of these two DEC genes suggests that cold induced ripening might occur via two different vernalization-associated pathways, and may influence the duration of cold-requirement in different pear cultivars.

Working in an antagonistic manner to VRN1 and VIN3, which downregulate repressors of endodormancy release, are *FRIGIDA 4* and *CONSTANS-like* genes. Increased expression and activity of *FRIGIDA 4* results in increased activity of repressors of endodormancy release, such as *Flowering Locus C (FLC)*, in Arabidopsis [64] and blueberry [65]. *FRIGIDA 4* decreased significantly in expression throughout conditioning in ‘Bartlett’, suggesting that its downregulation may correspond to decreased activation of ripening repressors in a role homologous to regulation of flowering time (Figure 4).

In addition to *FRIGIDA 4*, overexpression of *CONSTANS-like 9* has been shown to delay flowering and regulate the circadian clock by repressing *CONSTANS* and Flowering Locus T (*FT*) gene expression in photoperiod sensitive plants, like Arabidopsis [66]. Recently, however, *CONSTANS-like* gene families have been shown to display distinct, tissue-specific patterns of expression in banana fruit and pulp, in addition to other tissues [67], suggesting that *CONSTANS-like* gene family members play a role not only in flower development, but also, fruit development and senescence. *CONSTANS-like 9, 5, 6, 13, and 14* were all differentially expressed. Overall, the *CONSTANS-like* genes displayed a similar decreasing expression trend in both cultivars throughout the conditioning period (Figure 4). As with *FRIGIDA 4*, this decrease suggests that the repressive role of these genes with regards to process of endodormancy release is downregulated during cold conditioning, thereby promoting ripening.

## Functional Enrichment Analysis

Shared overrepresented terms included ‘cold acclimation’, dormancy-related (‘embryo development ending in seed dormancy’, ‘flowering’), hormone signaling (‘ethylene-activated signaling pathway’, ‘ABA-activated signaling pathway’, ‘auxin-activated signaling pathway’), hormone biosynthesis (‘jasmonic acid biosynthetic process’, ‘salicylic acid biosynthetic process’, ‘brassinosteroid biosynthetic process’), and respiration-associated processes (‘ATP synthesis coupled proton transport’, ‘electron transfer activity’) (Figure 5). The shared overrepresentation of cold- and dormancy-related GO terms lends support to mediation of cold-induced ripening responses by vernalization-associated genes, in conjunction with downregulation of repressors of endodormancy release. Additionally, the presence of many enriched phytohormone-related ontologies lends support to the concept of interacting networks of phytohormonal crosstalk that serve to mediate ripening and mitigate chilling injury [22, 29, 68]. This lends support to the importance of auxin biosynthesis and metabolism during the ripening process in *Pyrus*. Finally, enriched ontologies associated with mitochondrial respiration, which implicate a high rate of ATP production, provide further evidence that AOX1 alternative respiratory activity is needed to alleviate some of the stress on the cytochrome respiratory pathway during ripening [69]. While shared enriched GO terms lend insight into conserved biological basis for cold-conditioning mediated ripening, enriched ontologies unique to ‘D’Anjou’ or ‘Bartlett’ provide information regarding the cultivar-specific ripening responses.

'D'Anjou' pears are genetically programmed to require a longer conditioning time to ripen than 'Bartlett' pears (60 versus 15 days of conditioning at 0°C). Overrepresented GO terms unique to 'D'Anjou' associated with chilling-induced endodormancy release included 'seed germination' and 'methylation', while for 'Bartlett' such terms included 'vernalization response', 'regulation of seed germination' (Figure 5). Regulation of vernalization sensitive genes, including homologs of those governing timing of seedling germination in many crops, is highly dependent on methylation status and other epigenetic modifications, suggesting that such genes may play a larger role in the ripening of 'D'Anjou'. Further investigation is needed of the effects of external abiotic factors like chilling on the epigenome of fruit undergoing developmental transitions such as a shift to ripening. The overrepresentation of terms associated with respiration and senescence are expected, as such processes are characteristic of ripening and the terminal stages of fruit development. In 'D'Anjou', the terms 'aerobic respiration' and 'aging' were overrepresented, while in 'Bartlett', TCA cycle-associated terms ('tricarboxylic acid cycle', 'malate metabolic process', 'malate dehydrogenase activity', 'isocitrate metabolic process') were overrepresented (Figure 5). Differential overrepresentation of aerobic respiration and TCA cycle metabolism GO terms in the two cultivars suggest that these processes are under cultivar-specific regulation. Interestingly, enrichment of terms associated with production of protective boundary layers ('cutin biosynthetic process', 'cuticle development') may represent a genetically programmed stress management strategy considering long conditioning requirements. Development of such barriers could mitigate the occurrence of chilling injury while 'D'Anjou' fruits accumulate the required chilling hours (Figure 5). In 'Bartlett', 'sulfur assimilation' and 'methionine metabolic process' were enriched. This is interesting because the Yang cycle, which recycles the sulfur containing amino acid methionine, also feeds into the production of the ethylene biosynthetic precursor ACC. Increased sulfur metabolic capacity in 'Bartlett' may in turn correspond to higher methionine cycling capacity, and therefore production of ethylene for this cultivar. Based on this finding, and that of the DE analysis, in which ATP sulfurylases were highly expressed during conditioning and ripening in 'Bartlett,' it is possible that cold conditioning directly or indirectly induces sulfur metabolism, thereby inducing ethylene biosynthesis and downstream processes. This is the case for soybean, in which ATP-sulfurylase is induced by cold and catalyzes activation of sulfate [70, 71]. The GO analysis results implicate cold temperature induction of numerous metabolic pathways, many of which operate upstream or independently of ethylene. This observation aligns with a recent study in cold conditioned pear fruit that demonstrated that LT induces expression of both ethylene-dependent and independent genes affecting ripening [25]. Complete ontology results can be found in Supplementary File 7.

To summarize, the ontology enrichment results provide a global overview with regards to some of the overarching processes responsible for cold-induced, ripening induction in pear. These results lend credibility to the role of vernalization-associated genes, and their potential role in influencing the duration of cold required for conditioning for fruit ripening.

## Conclusion

In this study, time-course differential expression analysis, functional annotation and GO enrichment methods were used to identify candidate genes and gene networks associated with the chilling requirement for ripening in pear. The results agree with previously reported expression patterns of known ripening-related genes during achievement of ripening



competency, specifically genes associated with ethylene biosynthesis and phytohormonal crosstalk. A novel outcome of this study was that differentially expressed cold-responsive, vernalization-associated genes may play a role in the ripening of European pear. While described in other systems, these genes have not yet been characterized with respect to their role in climacteric ripening.

Notably, *AOX* expression results are consistent with our recent work in pear, providing support for the possible role of cold-induced *AOX* activity in the achievement of ripening competency. *AOX* has been described previously in the context of cold stress response and ROS mediation, and more recently in pre-climacteric S2-S2 transitional phase [26, 53, 69]. Its expression and activity may be linked to or activated in conjunction with vernalization-associated genes via ROS as a response to cold temperatures (Figure 6). Further studies are needed to elucidate the precise connections, but it is clear based on expression data that these transcripts share a similar response to cold conditioning in pear fruit.

Based on these findings, the mechanism by which vernalization-associated genes may mediate cold-induced ripening may manifest as follows: Cold temperature stimulates *VIN3* or *VRN1* in a cultivar dependent manner. These, in turn inhibit fruit-tissue specific repressors of endodormancy release (*CONSTANS-like 9*, *FRIGIDA 4*, dormancy-associated *MADS-box* genes, and *ERF2*). Inhibition of repressors of endodormancy release, such as *BZR1* and *MSI4* and *ABA* precursors, via *VRN1* and *VIN3* pathways allows for activation of ripening-specific transcription factors, such as *MYB1R1* and others, which may regulate autocatalytic ethylene production during conditioning [22]. ROS induced by cold temperatures may concurrently serve to activate *AOX* and ethylene response factors [27, 72]. The normal ripening climacteric, characterized by the conversion of *ACC* to ethylene by *ACS*, commences following transcription factor-mediated activation. Ethylene biosynthesis and response results in activation of downstream ripening processes (Figure 6).

Results of this study provide new information with regards to vernalization and cold response-associated genes that are differentially expressed over time during conditioning and subsequent ripening. Many of the genes which have been identified as potential regulators of chilling-induced ripening in pear fruit represent members of diverse gene families. Furthermore, several studies have previously indicated the diversification and neofunctionalization of *VRN*, *VIN*, *CONSTANS-like* gene families among others, in a multitude of plant tissues, including roots, shoots, leaves, apical meristems, buds, and flowers [67, 73]. Here we provide evidence suggesting that members of these gene families have diversified to play similar roles in chilling-dependent fruit ripening. These findings lend support to the idea of chilling-induced ripening as a process of endodormancy release that might explain the underlying basis of different chilling requirement across different cultivars.

## Materials and Methods

### Experimental Design

The experimental design was as previously reported [26]. Briefly, ‘Bartlett’ and ‘D’Anjou’ pear fruit were obtained from Blue Star Growers (Cashmere, Washington). During the

time between harvest and acquisition (5 days), the pear fruit was maintained in temporary storage at 1°C. ‘Bartlett’ fruit had a mean firmness of 76.2 N, and 13.40 °Brix and ‘D’Anjou’ fruit had a mean firmness of 53.5 N, and 12.66 °Brix at initiation of the experiment. Ripening of ‘Bartlett’ requires 15 days of cold conditioning, while ‘D’Anjou’ typically requires 60 days of -1°C to attain ripening competency [9, 10]. The duration of cold conditioning, however, is reduced when conditioning temperatures are increased to 10°C [8]. Pears were divided into equal replicate groups and then placed into storage at 10°C for conditioning [8]. After the conditioning period (Figure 7), the fruit was transferred to 180-liter flow-through respiration chambers held at 20°C for seven days. The flow rate of the chambers was maintained at 5.0 ml/min with compressed air. Fruit was evaluated at four physiological time points: at 0% conditioned, 50% conditioned, and 100% conditioned and 100% ripened, which comprised 7 days after completion of conditioning. The pears that were allowed to accumulate the required chilling hours for ripening were transferred to 20°C and were then sampled at the 100% ripened time point (Figure 7). These time points were similar to previously utilized physiological stages determined during conditioning [26].

## **Fruit firmness measurements and tissue sampling**

Firmness was measured for 10 replicate fruit at each sampling time point. A GS-14 Fruit Texture Analyzer (GÜSS Instruments, South Africa) equipped with an 8.0 mm probe set at 5.0 mm flesh penetration was used to measure firmness at two equidistant points around the equatorial region of each fruit after removal of the peel. Firmness data were assessed using ANOVA, following the statistical approaches described previously [74, 75].

## **RNA Extraction**

Peel tissue used in this study was the same as that used for the qRT-PCR study, published recently [26]. Briefly, peel tissue was obtained from a 1 cm wide equatorial region of 3 randomly sampled fruit of each cultivar and at each conditioning time point, flash frozen in liquid nitrogen, pooled for each treatment/time point, and then ground using a SPEX Freezer/Mill 6870 (Metuchen, NJ USA). Total RNA was extracted from pulverized ‘D’Anjou’ and ‘Bartlett’ peel tissue for each of the four technical replicates at 0% conditioned, 50% conditioned, 100% conditioned, and 100% ripened time points following the methods of [76]. Contaminating genomic DNA was removed with DNaseI per manufacturer instructions (NEB, Ipswich, MA USA). RNA was quality checked using a denaturing gel and BioAnalyzer 2100 (Agilent, CA, USA) and was quantified using Nanodrop 2000 spectrophotometer (Thermo Scientific, Waltham, MA, USA).

## **Illumina Sequencing**

cDNA libraries were qualified and quantified using a Life Technologies Qubit Fluorometer (Carlsbad, CA) as well as an Agilent 2100 Bioanalyzer (Santa Clara, CA). The cDNA libraries prepared from the extracted RNA were sequenced on an Illumina Hi Seq 4000 platform as 2x100 paired end reads. The Illumina TruSeq RNA Sample Preparation v2 kit (San Diego, CA) was used to generate the final library molecules, and the Ailine Biosciences’

(Woburn, MA) DNA SizeSelector-I bead protocol was used to filter for library molecules of >450 base pairs.

## **Transcriptome Assembly**

Transcriptome assembly was performed as reported previously [77, 78]. The 2x100 paired end fastq files generated using Illumina HiSeq 2000 were input into the CLC Bio Genomics Workbench (ver 6.0.1) (Aarhus, Denmark) for pre-processing and assembly. The CLC Create Sequencing QC report tool was used to assess quality. The CLC Trim Sequence process was used to trim quality scores with a limit of 0.001, corresponding to a Phred value of 30. Ambiguous nucleotides were trimmed, and the 13 5' terminal nucleotides removed. Reads below length 34 were discarded. Overlapping pairs were merged using the 'Merge Overlapping Pairs' tool, and a subsequent de novo assembly was performed with all datasets. Parameters used in the assembly are as follows: Map reads back to contigs = TRUE, Mismatch cost = 2, Insertion cost = 3, Deletion cost = 0.4, Similarity Fraction = 0.95, Global Alignment = TRUE, Minimum contig length = 200, Update contigs = true, Auto-detect paired distances = TRUE, Create list of unmapped reads = TRUE, Perform scaffolding = TRUE. The de novo assembly resulted in the production of 140,077 contiguous sequences (contigs). Contigs with less than 2x coverage and those less than 200bp in length were eliminated. For each individual dataset (treatment/replicate) the original, non-trimmed reads were mapped back to the master assembly subset. Default parameters were used, except for the length fraction, which was set to 0.5, and the similarity fraction, which was set to 0.9. Mapping resulted in the generation of individual treatment sample reads per contig. The master transcriptome was exported as a fasta file for functional annotation and the read counts for each dataset were exported for normalization with the Reads Per Kilobase per Million reads (RPKM) method [79].

## **Functional Annotation with Blast2GO**

The master transcriptome fasta produced from the Illumina assembly was imported into OmicsBox (BioBam Bioinformatics S.L., Valencia, Spain) for functional annotation of expressed contigs using the Blast2GO feature [80]. Contig sequences were identified by a blastx alignment against the NCBI 'Viridiplantae' database with an e-value specification of 10.0E-3. Gene ontology (GO) annotation was assigned using the 'Mapping' and 'Annotation' features. Expression analysis was limited to the consensus sequence for each contig, and therefore in this paper we do not distinguish between specific alleles, highly similar gene family members. This is due to assembler constraints [81].

## **Differential Expression Analysis**

An Excel file was prepared containing 'D'Anjou' and 'Bartlett' RPKM data for each contig, treatment, and replicate. The data was imported into OmicsBox as a count table for differential expression analysis, which employs the maSigPro R package [82]. An additional experimental design matrix was imported which dictated the number of time points and replicates (Supplementary File 8). The level of FDR control was set to 0.05, resulting in identification of significant genes. A stepwise regression was employed to model the data and

then generate a list of all genes displaying significant linear or quadratic trends over the cold conditioning time course ( $R > 0.8$ ) [83] (Supplementary File 2).

## GO Enrichment Analysis

OmicsBox gene ontology (GO) enrichment analysis utilizing the Fisher's Exact Test was employed [80]. Due to many enriched GO terms, the resulting terms were reduced to only the most specific ontologies ( $p < 0.00001$ ). Ontologies shared between 'D' Anjou' and 'Bartlett' and unique to each cultivar were identified (Supplementary File 7).

## qRT-PCR validation

qRT-PCR was performed as reported earlier [26]. Briefly, RNA samples were treated with DNaseI to eliminate any DNA contamination according to the manufacturer's methods (NEB, Ipswich, MA USA), prior to cDNA synthesis. RNA concentration was determined for each sample using a Nanodrop ND-8000 (ThermoFisher, MA, USA). RNA quality was verified using a denaturing gel and BioAnalyzer 2100 (Agilent, CA USA). For each sample, 500 ng of total RNA was used to generate first strand cDNA using the Invitrogen VILO kit (Life Technologies, Carlsbad, CA USA). Each cDNA preparation was quantified, and the mean concentration calculated from eight replicate quantification measurements, recorded using a NanoDrop8000 (Thermo Fisher Scientific, Waltham, MA). The samples were diluted to a final concentration of 50 ng/uL. Initial qRT-PCR technical replicate reactions were prepared for each of the 90 selected genes using the iTaq Universal SYBR Green Supermix (BioRad, Hercules, CA). Primers for quantitative reverse transcriptase PCR (qRT-PCR) were designed from Pyrus ESTs or sequences derived from *Malus × domestica* transcripts among various hormonal and environmental signaling pathways. 500ng RNA for each sample (same as used for RNAseq) was used to generate 1st strand cDNA using the Invitrogen VILO kit (Life Technologies, Carlsbad, CA USA). cDNA preparations were then diluted to 50ng/uL. qRT-PCR technical replicate reactions were prepared for each of the genes using the iTaq Universal SYBR Green Supermix with ROX reference dye (BioRad, Hercules, CA) per the manufacturer's protocols with 100ng of template cDNA. In a Stratagene MX3005P, the following thermocycle profile was used: 95°C initial disassociation for 150s followed by 50 amplification cycles (95°C for 30s, 60°C for 30s, and 72°C for 30s) and a final, single cycle phase to generate a dissociation curve (95°C for 150s, 95°C for 30s, and 60°C for 30s). Using the LinRegPCR tool, we calculated the Cq values for each reaction [84, 85] (Supplementary File 9).

## Acknowledgements

The authors thank Blue Bird Growers (Peshastin, WA) and Blue Star Growers (Cashmere, WA) for providing pears for conditioning experiments and to Scott Mattinson for assistance in maintenance of the experimental infrastructure. Work in the Dhingra lab was supported in part by Washington State University Agriculture Center Research Hatch Grant WNP00011 and grant funding from Pear Bureau NW to AD. SLH acknowledges the support received from ARCS Seattle Chapter and National Institutes of Health/National Institute of General Medical Sciences through an institutional training grant award T32-GM008336. The contents of this work are

solely the responsibility of the authors and do not necessarily represent the official views of the NIGMS or NIH.



**Table 1.** Summary of differentially expressed contigs. Information includes general role or associated pathway, full and abbreviated names, contig number (corresponding to sequences, annotations, and expression values in Supplementary Files 1 and 2), length, and indication of significant differential expression and/or significant expression trends.

| General Role                   | Gene/Contig Name                                     | Abbreviation                       | Contig # | Contig Length (bp) | DE 'D'Anjou' (p<0.05) | DE 'Bartlett' (p<0.05) | Significant Trend 'D'Anjou' (R>0.8) | Significant Trend 'Bartlett' (R>0.8) |
|--------------------------------|------------------------------------------------------|------------------------------------|----------|--------------------|-----------------------|------------------------|-------------------------------------|--------------------------------------|
| Ethylene biosynthesis          | 1-aminocyclopropane-1-carboxylate oxidase 1          | ACO1                               | 24220    | 516                | Yes                   | Yes                    | Linear, Quadratic                   |                                      |
| Ethylene biosynthesis          | 1-aminocyclopropane-1-carboxylate synthase 1         | ACS1                               | 45750    | 1929               | No                    | Yes                    |                                     |                                      |
| Ethylene perception            | constitutive-triple-response 1, isoform X2           | CTR1 x2                            | 2886     | 2978               | Yes                   | Yes                    |                                     | Linear, Quadratic                    |
| Ethylene perception            | Copper-transporting ATPase RAN1-like                 | RAN1-like                          | 36171    | 366                | No                    | Yes                    |                                     |                                      |
| Ethylene perception            | Reversion-to-ethylene-sensitivity 1                  | RTE1                               | 4369     | 954                | Yes                   | Yes                    | Linear                              |                                      |
| Ethylene regulatory            | Brassinazole-resistant 1 homolog 4-like              | BZR1 4-like                        | 42873    | 538                | Yes                   | Yes                    |                                     |                                      |
| Ethylene regulatory            | Multicopy Suppressor of IRA4                         | MSI4                               | 20932    | 1494               | No                    | Yes                    |                                     |                                      |
| Ethylene regulatory            | Transcription factor MYB1R1                          | MYB1R1                             | 17108    | 1358               | Yes                   | Yes                    |                                     |                                      |
| Ethylene response              | Ethylene responsive transcription factor ERF060-like | ERF060-like                        | 22945    | 388                | Yes                   | Yes                    | Linear                              |                                      |
| ABA metabolism                 | abscisic-aldehyde oxidase-like                       | AAO                                | 23005    | 1294               | No                    | Yes                    |                                     |                                      |
| ABA metabolism                 | abscisic acid insensitive 5-7                        | ABI5-7                             | 9409     | 573                | Yes                   | Yes                    | Linear, Quadratic                   |                                      |
| ABA metabolism                 | abscisic acid 8'-hydroxylase 2                       | CYP707A                            | 40225    | 1904               | Yes                   | Yes                    |                                     |                                      |
| ABA metabolism                 | 9-cis-epoxycarotenoid dioxygenase                    | NCED1                              | 8780     | 796                | Yes                   | Yes                    | Linear, Quadratic                   | Linear, Quadratic                    |
| Respiration                    | mitochondrial ubiquinol oxidase                      | AOX1-1                             | 57573    | 1434               | Yes                   | Yes                    |                                     |                                      |
| Respiration                    | mitochondrial ubiquinol oxidase-like                 | AOX1-2                             | 45965    | 1563               | Yes                   | Yes                    |                                     |                                      |
| Sulfur metabolism              | ATP sulfurylase 2                                    | ATP sulfurylase 2                  | 3305     | 2207               | Yes                   | Yes                    |                                     | Linear, Quadratic                    |
| Sulfur metabolism              | ATP sulfurylase 2, chloroplastic                     | ATP sulfurylase 2, chloroplastic   | 41025    | 211                | Yes                   | Yes                    |                                     |                                      |
| DNA repair                     | Breast Cancer Susceptibility Associated 1 homolog    | BRCA1 homolog                      | 25664    | 2219               | Yes                   | Yes                    | Linear, Quadratic                   |                                      |
| DNA repair                     | Next to BRCA1 1                                      | Next to BRCA1 1                    | 11190    | 1329               | Yes                   | Yes                    |                                     |                                      |
| Dormancy/Vernalization         | Dormancy-associated MADS-box transcription factor    | DAM                                | 6262     | 537                | Yes                   | Yes                    |                                     |                                      |
| Dormancy/Vernalization         | EARLY FLOWERING 3-like                               | EARLY FLOWERING 3-like             | 35358    | 1263               | Yes                   | Yes                    | Linear                              |                                      |
| Dormancy/Vernalization         | Ethylene insensitive-like 3                          | EIN3-like 3                        | 2217     | 2217               | Yes                   | Yes                    | Linear, Quadratic                   | Linear                               |
| Dormancy/Vernalization         | polycomb group EMBRYONIC FLOWER 2-like isoform X1    | EMBRYONIC FLOWER 2-like isoform X1 | 25290    | 696                | No                    | Yes                    |                                     |                                      |
| Dormancy/Vernalization         | Vernalization insensitive 3 2 isoform x2             | VIN3 2 isoform x2                  | 11789    | 2339               | Yes                   | Yes                    | Linear, Quadratic                   | Linear                               |
| Dormancy/Vernalization         | B3 domain-containing transcription factor VRN1-like  | VRN1-like                          | 567      | 1669               | No                    | Yes                    |                                     | Linear, Quadratic                    |
| Repression of dormancy release | Zinc finger CONSTANS-LIKE 14-like                    | COL14-like                         | 25134    | 1886               | Yes                   | Yes                    | Linear                              | Linear                               |
| Repression of dormancy release | Zinc finger CONSTANS-LIKE 5-like                     | COL5-like                          | 5185     | 1744               | Yes                   | Yes                    |                                     |                                      |
| Repression of dormancy release | Zinc finger CONSTANS-LIKE 9-like                     | COL9                               | 24463    | 2475               | Yes                   | Yes                    |                                     | Linear                               |
| Repression of dormancy release | FRIGIDA 4a                                           | FRIGIDA 4a                         | 3425     | 1116               | No                    | Yes                    |                                     | Linear                               |

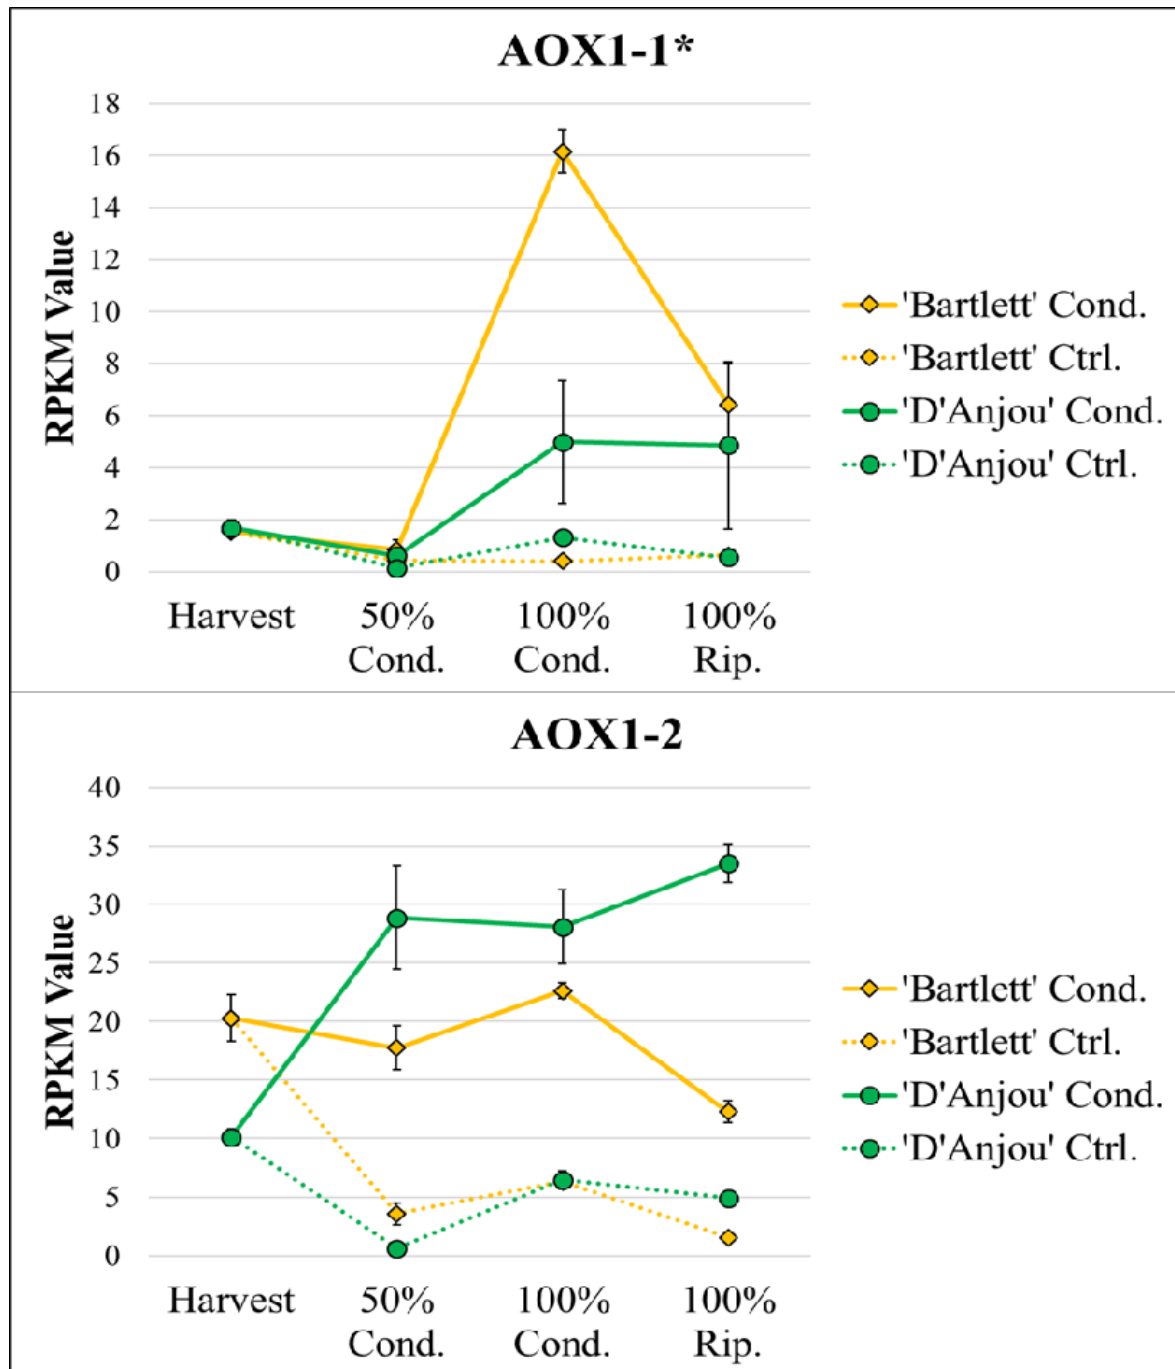

**Figure 1.** Two homologues of mitochondrial *AOX1* were found to be differentially expressed ( $p > 0.05$ ). Asterisk indicates significant differential expression over time in conditioned 'Bartlett', but not in conditioned 'D'Anjou. Significant linear and quadratic trends ( $R > 0.8$ ) displayed by genes can be seen in Table 1.

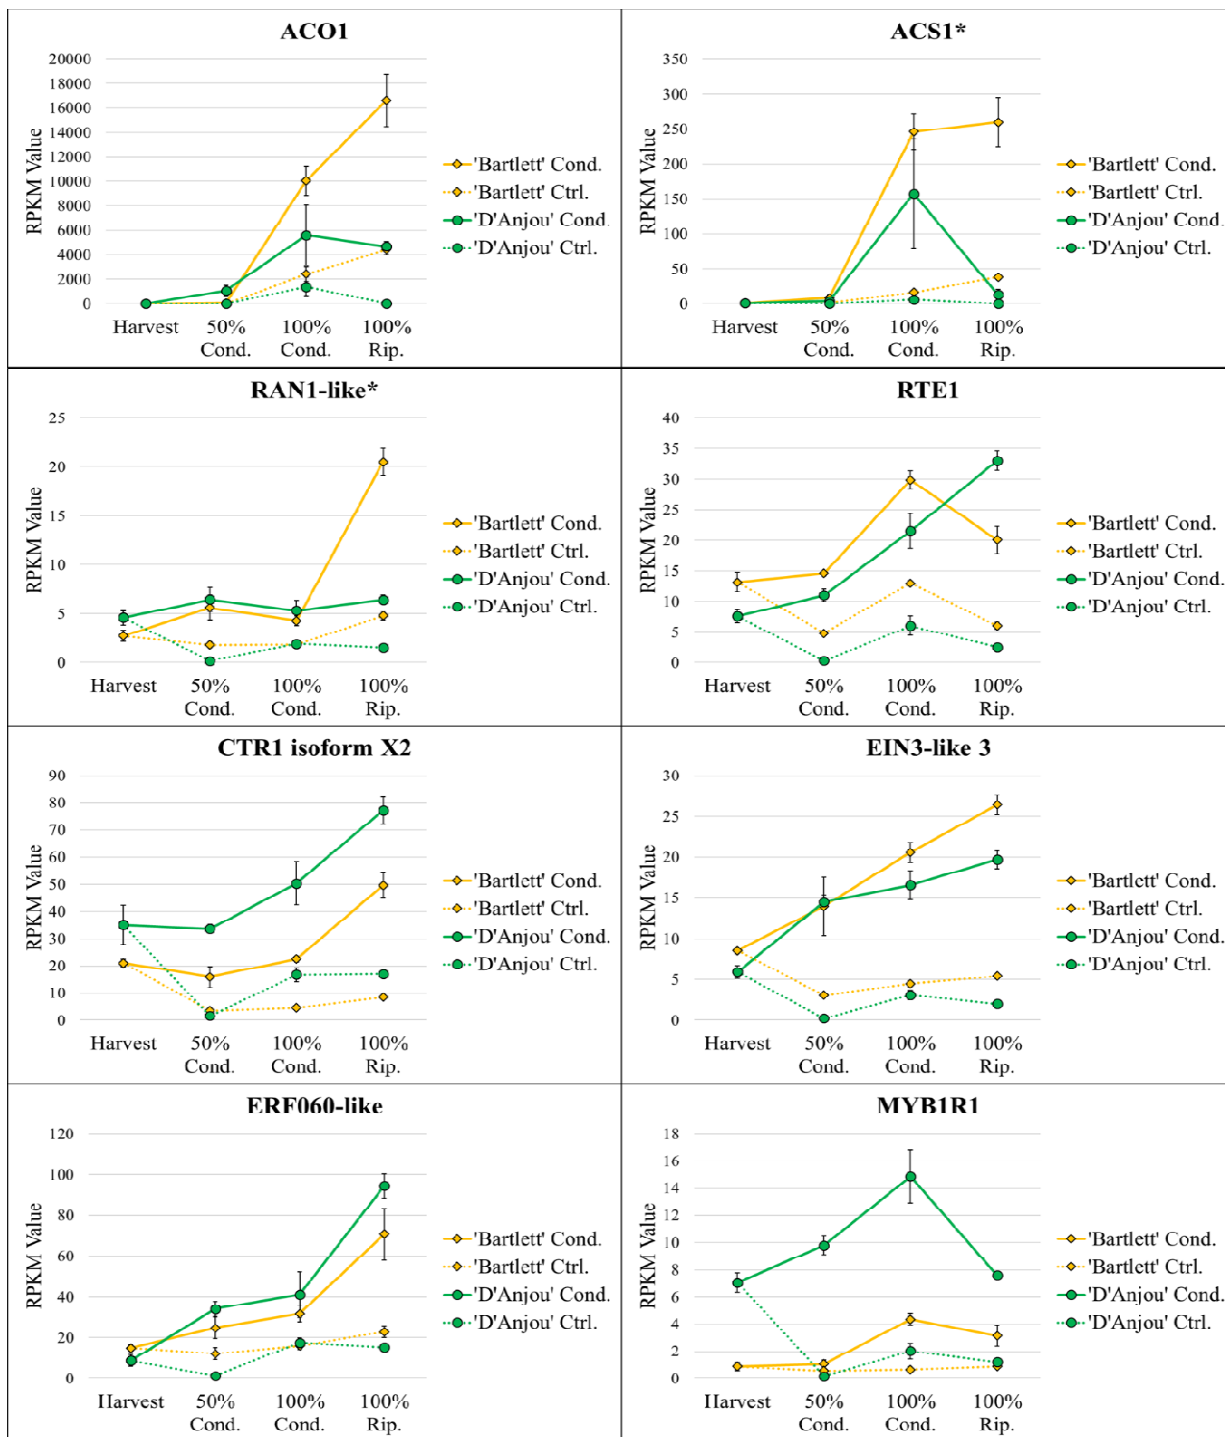

**Figure 2.** Transcript abundance for differentially expressed ethylene-associated contigs. Asterisk indicates significant differential expression over time in conditioned 'Bartlett' but not conditioned 'D'Anjou'. Significant linear and quadratic trends ( $R>0.8$ ) displayed by genes can be seen in Table 1.

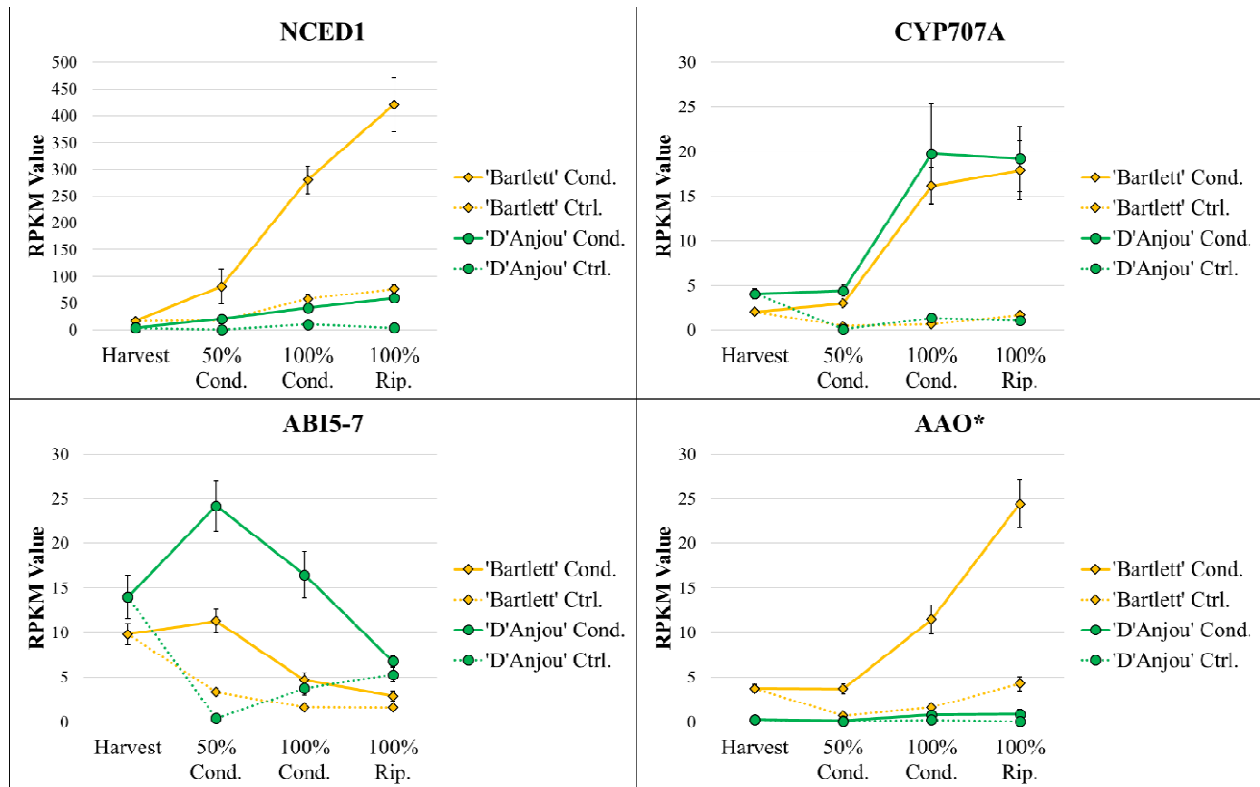

**Figure 3.** Transcript abundance for differentially expressed ABA-associated contigs ( $p < 0.05$ ). Asterisk indicates significant differential expression over time in conditioned 'Bartlett', but not in conditioned 'D'Anjou'. Significant linear and quadratic trends ( $R > 0.8$ ) displayed by genes can be seen in Table 1.

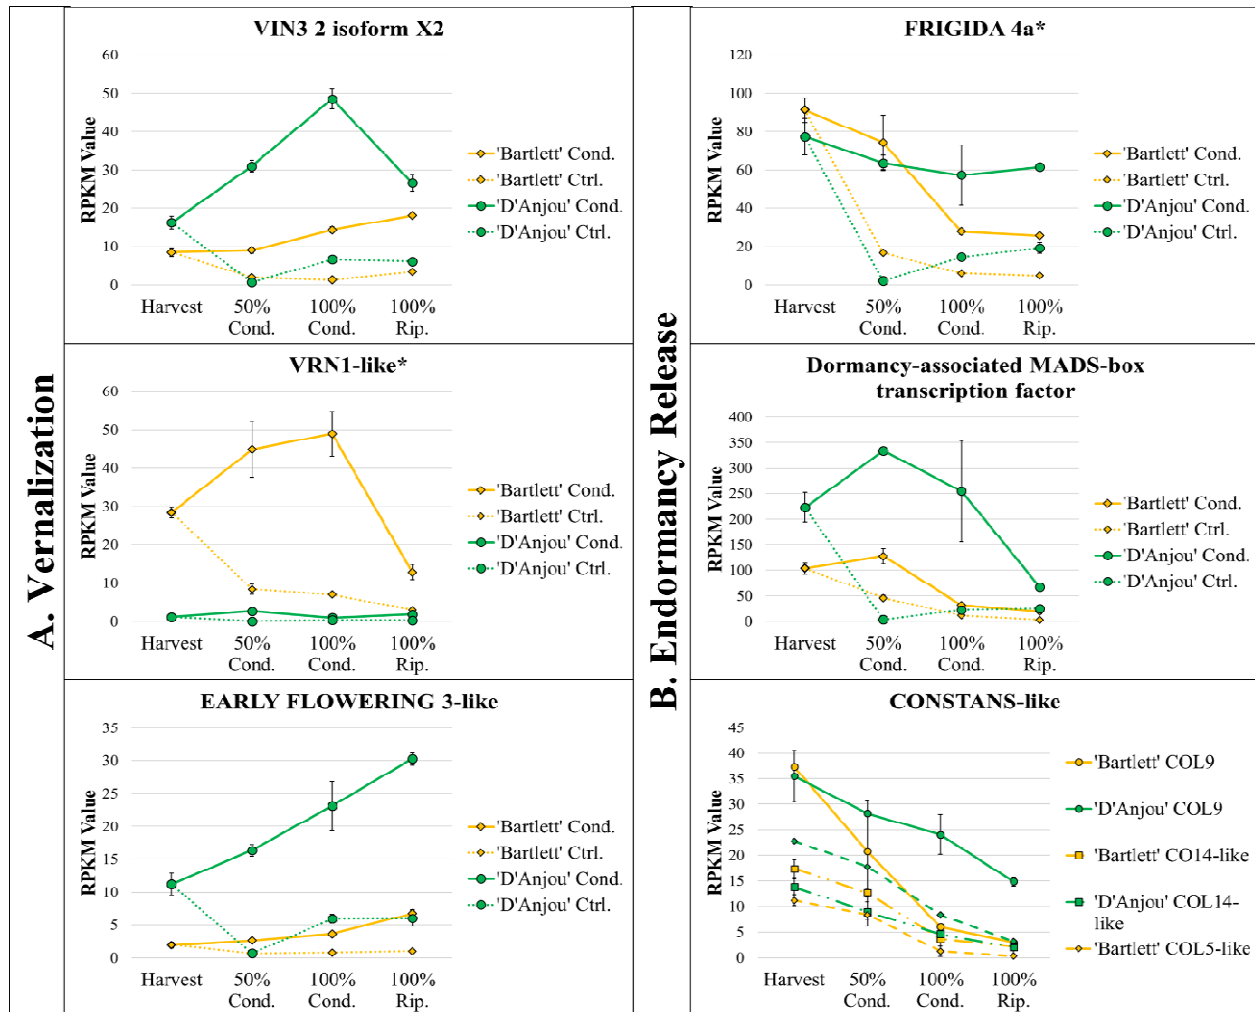

**Figure 4.** Differentially expressed vernalization-associated genes *VIN3* and *VRN1* and cold responsive *ERF3-like* ( $p > 0.05$ ) (column A) and differentially expressed endodormancy release-repressing genes *FRIGIDA 4a*, dormancy-associated MADS-box transcription factor, and *CONSTANS-like* over conditioning time course ( $p > 0.05$ ) (column B). Asterisks indicate significant differential expression over time in conditioned 'Bartlett' but not in conditioned 'D'Anjou'. Significant linear and quadratic trends ( $R > 0.8$ ) displayed by genes can be seen in Table 1.



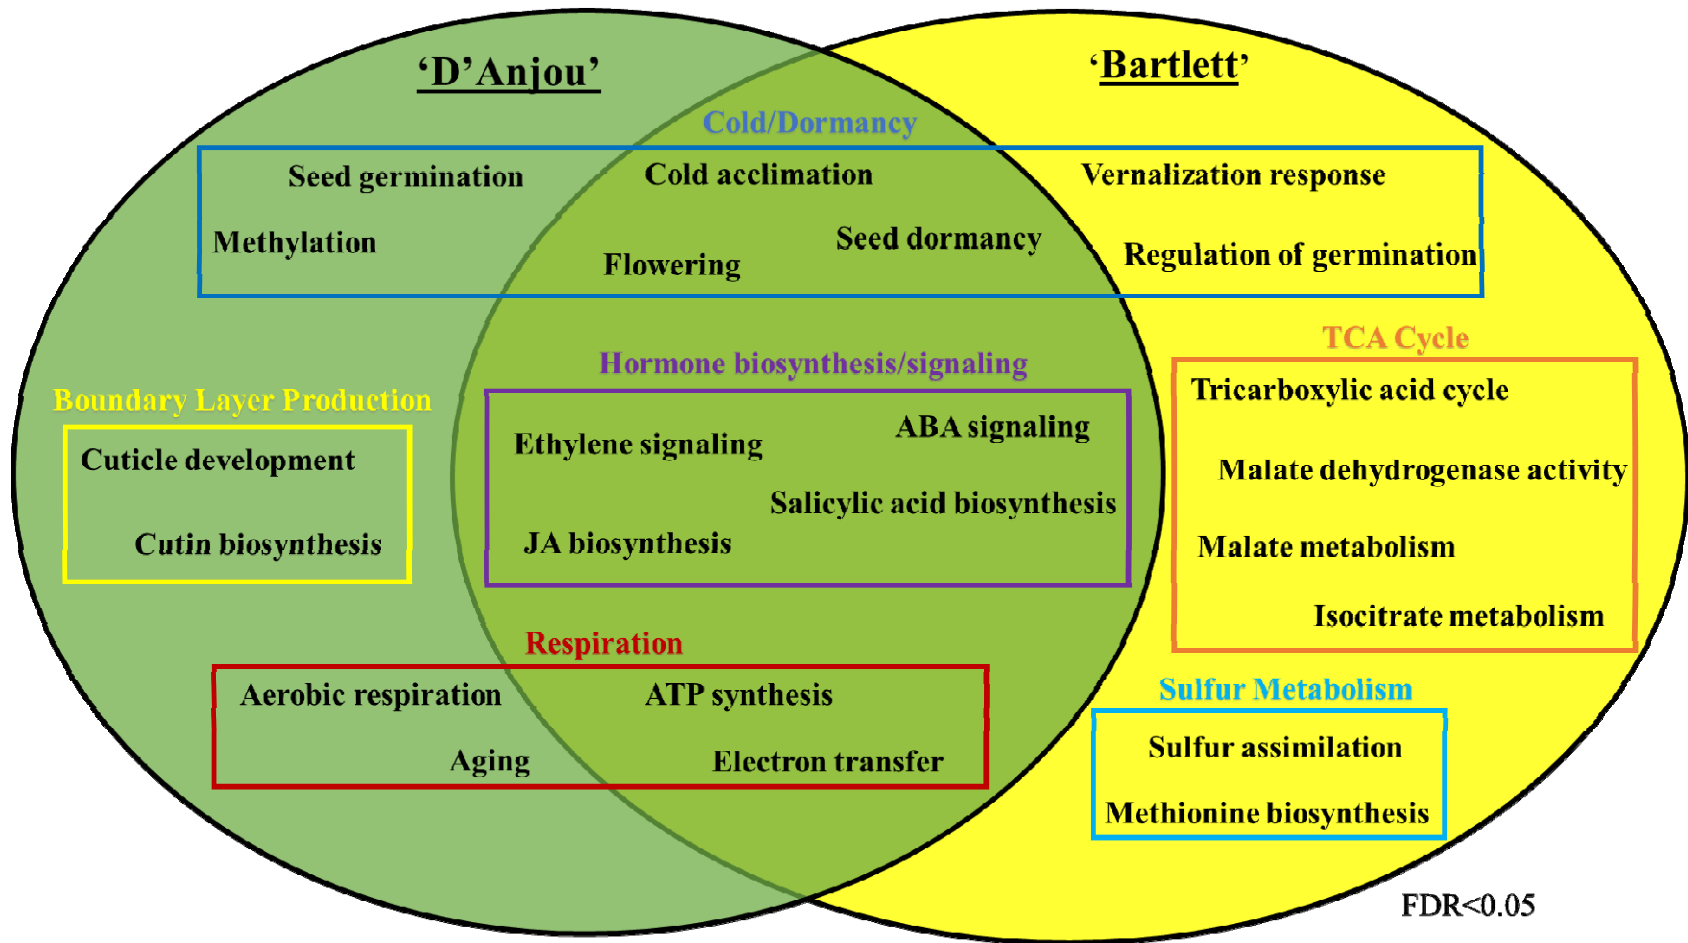

**Figure 5.** Selection of shared and unique overrepresented GO terms shared between 'D'Anjou' and 'Bartlett' cultivars that were identified using the OmicsBox enrichment analysis feature. Additional values can be seen in Supplementary File 7.

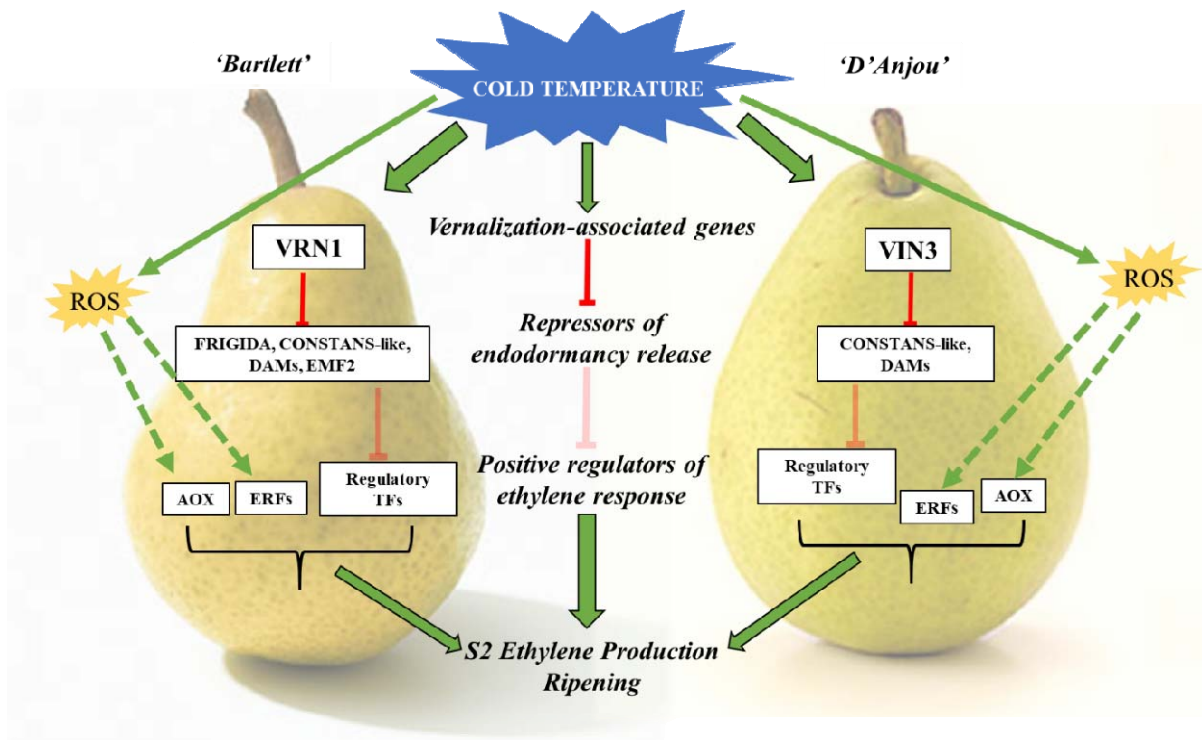

**Figure 6.** Model describing a possible mechanism by which vernalization-associated genes may mediate cold-induced ripening. Cold temperature stimulates VRN1/VIN3. Vernalization genes, in turn inhibit repressors of endodormancy release—FRIGIDA, CONSTANS-like, DAMs, EMF2. Downregulation of these repressors allows for transcriptional activation of ethylene response. Cold also triggers ROS signaling, leading to activation of ERFs [72] and AOX [27]. S2 ethylene production is triggered and ripening commences.

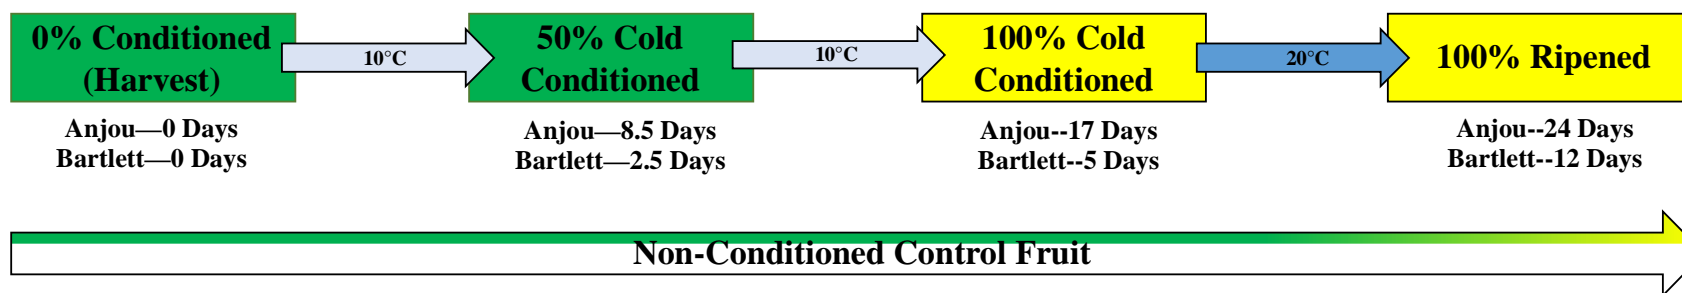

**Figure 7.** Conditioning time course schematic used for ‘D’ Anjou’ and ‘Bartlett’. Conditioning times were determined based on the established, cultivar-specific chilling conditions required for achievement of competency and ripening.

## SUPPLEMENTARY FILES

**Supplementary File 1.** Annotated master assembly fasta for cold conditioned ‘D’Anjou’ and ‘Bartlett’ pear fruit.

**Supplementary File 2.** Mean RPKM values, standard error, and time course differential expression information for cold conditioned ‘D’Anjou’ and ‘Bartlett’ pear fruit.

**Supplementary File 3.** Differential expression graphs for of ethylene regulatory genes *BZR1* and *MSI4*

**Supplementary File 4.** Differential expression graphs for sulfur metabolism-associated genes.

**Supplementary File 5.** Differential expression graph for *Polycomb group embryonic flower 2-like isoform x1 (EMF2)*.

**Supplementary File 6.** Differential expression graphs for BRCA1 and Next-to-BRCA1 genes.

**Supplementary File 7.** All shared and unique enriched gene ontologies for cold conditioned ‘D’Anjou’ and ‘Bartlett’ pear fruit.

**Supplementary File 8.** RPKM data files and experimental design files used for MaSigPro time-series differential expression analysis in OmicsBox.

**Supplementary File 9.** Quantitative RT-PCR validation with calculated expression values.

## References

1. Xie M, Huang Y, Zhang Y, Wang X, Yang H, Yu O, et al. Transcriptome profiling of fruit development and maturation in Chinese white pear (*Pyrus bretschneideri* Rehd). *Bmc Genomics*. 2013;14(1):1-20. doi: 10.1186/1471-2164-14-823.
2. Seymour GB, Tucker GA, Poole M, Giovann. The molecular biology and biochemistry of fruit ripening: Wiley Online Library; 2013.
3. Barry CS, Llop-Tous MI, Grierson D. The regulation of 1-aminocyclopropane-1-carboxylic acid synthase gene expression during the transition from system-1 to system-2 ethylene synthesis in tomato. *Plant Physiology*. 2000;123(3):979-86.
4. Klee HJ, Giovannoni JJ. Genetics and control of tomato fruit ripening and quality attributes. *Annual review of genetics*. 2011;45:41-59.
5. Alexander L, Grierson D. Ethylene biosynthesis and action in tomato: a model for climacteric fruit ripening. *Journal of Experimental Botany*. 2002;53(377):2039-55.
6. Hartmann C, Drouet A, Morin F. Ethylene and ripening of apple, pear and cherry fruit. *Plant Physiology and Biochemistry (France)*. 1987.
7. Hewitt S, Dhingra A. Beyond Ethylene: New Insights Regarding the Role of AOX in the Respiratory Climacteric. *BioRxiv*. 2019.
8. Sugar D, Einhorn TC. Conditioning temperature and harvest maturity influence induction of ripening capacity in 'd'Anjou' pear fruit. *Postharvest Biology and Technology*. 2011;60(2):121-4.
9. Sugar D, Basile SR. Low-temperature induction of ripening capacity in 'Comice' and 'Bosc' pears as influenced by fruit maturity. *Postharvest Biol Tec*. 2009;51(2):278-80.
10. Villalobos-Acuna M, Mitcham EJ. Ripening of European pears: the chilling dilemma. *Postharvest Biol Tec*. 2008;49(2):187-200. doi: 10.1016/j.postharvbio.2008.03.003. PubMed PMID: WOS:000257364600001.
11. Chiriboga M-A, Saladié M, Bordonaba JG, Recasens I, Garcia-Mas J, Larrigaudière C. Effect of cold storage and 1-MCP treatment on ethylene perception, signalling and synthesis: Influence on the development of the evergreen behaviour in 'Conference' pears. *Postharvest Biol Tec*. 2013;86:212-20.
12. Oraguzie N, Whitworth C, Brewer L, Hall A, Volz R, Bassett H, et al. Relationships of PpACS1 and PpACS2 genotypes, internal ethylene concentration and fruit softening in European (*Pyrus communis*) and Japanese (*Pyrus pyrifolia*) pears during cold air storage. *Plant breeding*. 2010;129(2):219-26.
13. Millar AA, Jacobsen JV, Ross JJ, Helliwell CA, Poole AT, Scofield G, et al. Seed dormancy and ABA metabolism in *Arabidopsis* and barley: the role of ABA 8'-hydroxylase. *The Plant Journal*. 2006;45(6):942-54.
14. Yan L, Loukoianov A, Tranquilli G, Helguera M, Fahima T, Dubcovsky J. Positional cloning of the wheat vernalization gene *VRN1*. *Proceedings of the National Academy of Sciences*. 2003;100(10):6263-8.
15. Levy YY, Mesnage S, Mylne JS, Gendall AR, Dean C. Multiple roles of *Arabidopsis* *VRN1* in vernalization and flowering time control. *Science*. 2002;297(5579):243-6.
16. Niu Q, Li J, Cai D, Qian M, Jia H, Bai S, et al. Dormancy-associated MADS-box genes and microRNAs jointly control dormancy transition in pear (*Pyrus pyrifolia* white pear group) flower bud. *Journal of experimental botany*. 2016;67(1):239-57.



17. Bower J, Dennison M, Fowler K, editors. Avocado and mango cold storage damage as related to water loss control. XXVI International Horticultural Congress: Issues and Advances in Postharvest Horticulture 628; 2002.
18. Lederman IE, Zauberman G, Weksler A, Rot I, Fuchs Y. Ethylene-forming capacity during cold storage and chilling injury development in 'Keitt' mango fruit. *Postharvest Biol Tec.* 1997;10(1):107-12.
19. Saavedra GM, Figueroa NE, Poblete LA, Cherian S, Figueroa CR. Effects of preharvest applications of methyl jasmonate and chitosan on postharvest decay, quality and chemical attributes of *Fragaria chiloensis* fruit. *Food chemistry.* 2016;190:448-53.
20. !!! INVALID CITATION !!! {}.
21. Nham NT. Investigation of the Molecular Mechanisms Regulating the Development of Ripening Capacity in European Pears (*Pyrus communis* L. cv Bartlett): University of California, Davis; 2016.
22. Nham NT, Macnish AJ, Zakharov F, Mitcham EJ. 'Bartlett' pear fruit (*Pyrus communis* L.) ripening regulation by low temperatures involves genes associated with jasmonic acid, cold response, and transcription factors. *Plant Science.* 2017;260:8-18.
23. Han Y, Kuang J, Chen J, Liu X, Xiao Y, Fu C, et al. Banana Transcription Factor MaERF11 Recruits Histone Deacetylase MaHDA1 and Represses the Expression of MaACO1 and Expansins during Fruit Ripening. *Plant Physiology.* 2016;168(1):357-76. doi: <http://dx.doi.org/10.1104/pp.16.00301>.
24. Nham NT, Macnish AJ, Zakharov F, Mitcham EJ. 'Bartlett' pear fruit (*Pyrus communis* L.) ripening regulation by low temperatures involves genes associated with jasmonic acid, cold response, and transcription factors. *Plant Science.* 2017;260:8-18. doi: <https://doi.org/10.1016/j.plantsci.2017.03.008>.
25. Mitalo OW, Tosa Y, Tokiwa S, Kondo Y, Azimi A, Hojo Y, et al. 'Passe Crassane' pear fruit (*Pyrus communis* L.) ripening: Revisiting the role of low temperature via integrated physiological and transcriptome analysis. *Postharvest Biology and Technology.* 2019;158:110949.
26. Hendrickson C, Hewitt S, Swanson ME, Einhorn T, Dhingra A. Evidence for pre-climacteric activation of AOX transcription during cold-induced conditioning to ripen in European pear (*Pyrus communis* L.). *bioRxiv.* 2019:755686. doi: 10.1101/755686.
27. Saha B, Borovskii G, Panda SK. Alternative oxidase and plant stress tolerance. *Plant signaling & behavior.* 2016;11(12):e1256530.
28. Erdal S, Genisel M, Turk H, Dumlupinar R, Demir Y. Modulation of alternative oxidase to enhance tolerance against cold stress of chickpea by chemical treatments. *J Plant Physiol.* 2015;175:95-101.
29. Wang L, Baldwin EA, Plotto A, Luo W, Raithore S, Yu Z, et al. Effect of methyl salicylate and methyl jasmonate pre-treatment on the volatile profile in tomato fruit subjected to chilling temperature. *Postharvest Biol Tec.* 2015;108:28-38.
30. Szal B, Rychter A. Alternative oxidase-never ending story. *Postepy biochemii.* 2016;62(2):138-48.
31. Hendrickson C, Hewitt S, Swanson ME, Einhorn T, Dhingra A. Evidence for pre-climacteric activation of AOX transcription during cold-induced conditioning to ripen in European pear (*Pyrus communis* L.). *Plos One.* 2019. doi: 10.1371/journal.pone.0225886.

32. Selinski J, Hartmann A, Deckers-Hebestreit G, Day DA, Whelan J, Scheibe R. Alternative oxidase isoforms are differentially activated by tricarboxylic acid cycle intermediates. *Plant physiology*. 2018;176(2):1423-32.
33. Holtzapffel RC, Finnegan PM, Millar AH, Badger MR, Day DA. Mitochondrial protein expression in tomato fruit during on-vine ripening and cold storage. *Functional plant biology*. 2002;29(7):827-34.
34. Xu F, Yuan S, Zhang D-W, Lv X, Lin H-H. The role of alternative oxidase in tomato fruit ripening and its regulatory interaction with ethylene. *Journal of Experimental Botany*. 2012;63(15):5705-16. doi: 10.1093/jxb/ers226.
35. Perotti VE, Moreno AS, Podestá FE. Physiological aspects of fruit ripening: the mitochondrial connection. *Mitochondrion*. 2014;17:1-6.
36. Villalobos-Acuña MG, Biasi WV, Flores S, Mitcham EJ, Elkins RB, Willits NH. Preharvest application of 1-methylcyclopropene influences fruit drop and storage potential of 'bartlett' pears. *Hortscience*. 2010;45(4):610-6.
37. Alba R, Payton P, Fei Z, McQuinn R, Debbie P, Martin GB, et al. Transcriptome and selected metabolite analyses reveal multiple points of ethylene control during tomato fruit development. *The Plant Cell*. 2005;17(11):2954-65.
38. Liu M, Pirrello J, Chervin C, Roustan J-P, Bouzayen M. Ethylene Control of Fruit Ripening: Revisiting the Complex Network of Transcriptional Regulation. *Plant physiology*. 2015;169(4):2380-90. Epub 2015/10/28. doi: 10.1104/pp.15.01361. PubMed PMID: 26511917.
39. Nham NT, Willits N, Zakharov F, Mitcham EJ. A model to predict ripening capacity of 'Bartlett' pears (*Pyrus communis* L.) based on relative expression of genes associated with the ethylene pathway. *Postharvest biology and technology*. 2017;128:138-43.
40. Guo Yf, Shan W, Liang Sm, Wu Cj, Wei W, Chen Jy, et al. MaBZR1/2 act as transcriptional repressors of ethylene biosynthetic genes in banana fruit. *Physiol Plantarum*. 2019;165(3):555-68.
41. Xie X, Song J, Wang Y, Sugar D. Ethylene synthesis, ripening capacity, and superficial scald inhibition in 1-MCP treated 'd'Anjou' pears are affected by storage temperature. *Postharvest Biol Tec*. 2014;97:1-10.
42. Huang G, Li T, Li X, Tan D, Jiang Z, Wei Y, et al. Comparative transcriptome analysis of climacteric fruit of Chinese pear (*Pyrus ussuriensis*) reveals new insights into fruit ripening. *PloS one*. 2014;9(9):e107562.
43. Bai G, Yang D-H, Zhao Y, Ha S, Yang F, Ma J, et al. Interactions between soybean ABA receptors and type 2C protein phosphatases. *Plant molecular biology*. 2013;83(6):651-64.
44. Osorio S, Vallarino JG, Szecowka M, Ufaz S, Tzin V, Angelovici R, et al. Alteration of the Interconversion of Pyruvate and Malate in the Plastid or Cytosol of Ripening Tomato Fruit Invokes Diverse Consequences on Sugar But Similar Effects on Cellular Organic Acid, Metabolism, and Transitory Starch Accumulation. *Plant Physiology*. 2013;161(2):628-43.
45. Okamoto M, Kuwahara A, Seo M, Kushiro T, Asami T, Hirai N, et al. CYP707A1 and CYP707A2, which encode abscisic acid 8'-hydroxylases, are indispensable for proper control of seed dormancy and germination in Arabidopsis. *Plant Physiology*. 2006;141(1):97-107.
46. Jia H, Jiu S, Zhang C, Wang C, Tariq P, Liu Z, et al. Abscisic acid and sucrose regulate tomato and strawberry fruit ripening through the abscisic acid-stress-ripening transcription factor. *Plant biotechnology journal*. 2016;14(10):2045-65. Epub 2016/05/04. doi: 10.1111/pbi.12563. PubMed PMID: 27005823.

47. Shu K, Chen Q, Wu Y, Liu R, Zhang H, Wang S, et al. ABSCISIC ACID-INSENSITIVE 4 negatively regulates flowering through directly promoting Arabidopsis FLOWERING LOCUS C transcription. *Journal of Experimental Botany*. 2015;67(1):195-205. doi: 10.1093/jxb/erv459.
48. Hu L-Y, Hu S-L, Wu J, Li Y-H, Zheng J-L, Wei Z-J, et al. Hydrogen sulfide prolongs postharvest shelf life of strawberry and plays an antioxidative role in fruits. *Journal of agricultural and food chemistry*. 2012;60(35):8684-93.
49. Li D, Limwachiranon J, Li L, Du R, Luo Z. Involvement of energy metabolism to chilling tolerance induced by hydrogen sulfide in cold-stored banana fruit. *Food chemistry*. 2016;208:272-8.
50. Luo Z, Li D, Du R, Mou W. Hydrogen sulfide alleviates chilling injury of banana fruit by enhanced antioxidant system and proline content. *Scientia Horticulturae*. 2015;183:144-51.
51. Ziogas V, Molassiotis A, Fotopoulos V, Tanou G. Hydrogen sulfide: A potent tool in postharvest fruit biology and possible mechanism of action. *Frontiers in Plant Science*. 2018;9.
52. Hu K-D, Wang Q, Hu L-Y, Gao S-P, Wu J, Li Y-H, et al. Hydrogen sulfide prolongs postharvest storage of fresh-cut pears (*Pyrus pyrifolia*) by alleviation of oxidative damage and inhibition of fungal growth. *PLoS one*. 2014;9(1):e85524.
53. Dhingra A, Hendrickson C. Control of ripening and senescence in pre-harvest and post-harvest plants and plant materials by manipulating alternative oxidase activity. Google Patents; 2017.
54. Ford B, Deng W, Clausen J, Oliver S, Boden S, Hemming M, et al. Barley (*Hordeum vulgare*) circadian clock genes can respond rapidly to temperature in an EARLY FLOWERING 3 -dependent manner. *Journal of Experimental Botany*. 2016;67(18):5517-28. doi: 10.1093/jxb/erw317.
55. Yoshida N, Yanai Y, Chen L, Kato Y, Hiratsuka J, Miwa T, et al. EMBRYONIC FLOWER2, a novel polycomb group protein homolog, mediates shoot development and flowering in Arabidopsis. *The Plant cell*. 2001;13(11):2471-81. doi: 10.1105/tpc.010227. PubMed PMID: 11701882.
56. Jiao Y, Zhang Y, Zhu YX. Recent advances in the research for the homolog of breast cancer associated gene AtROW1 in higher plants. *Sci China Life Sci*. 2016;59(8):825-31. Epub 2016/08/10. doi: 10.1007/s11427-016-5086-6. PubMed PMID: 27502904.
57. Trapp O, Seeliger K, Puchta H. Homologs of breast cancer genes in plants. *Front Plant Sci*. 2011;2:19.
58. Zhou J, Zhang Y, Qi J, Chi Y, Fan B, Yu J-Q, et al. E3 Ubiquitin Ligase CHIP and NBR1-Mediated Selective Autophagy Protect Additively against Proteotoxicity in Plant Stress Responses. *PLoS genetics*. 2014;10(1):e1004116. doi: 10.1371/journal.pgen.1004116.
59. Rampey RA, LeClere S, Kowalczyk M, Ljung K, Sandberg G, Bartel B. A family of auxin-conjugate hydrolases that contributes to free indole-3-acetic acid levels during Arabidopsis germination. *Plant Physiology*. 2004;135(2):978-88.
60. Oliver SN, Deng W, Casao MC, Trevaskis B. Low temperatures induce rapid changes in chromatin state and transcript levels of the cereal VERNALIZATION1 gene. *Journal of experimental botany*. 2013:ert095.
61. Trevaskis B, Bagnall DJ, Ellis MH, Peacock WJ, Dennis ES. MADS box genes control vernalization-induced flowering in cereals. *Proceedings of the National Academy of Sciences*. 2003;100(22):13099-104.
62. Trevaskis B. The central role of the VERNALIZATION1 gene in the vernalization response of cereals. *Functional Plant Biology*. 2010;37(6):479-87.

63. Sung S, Amasino RM. Vernalization in *Arabidopsis thaliana* is mediated by the PHD finger protein VIN3. *Nature*. 2004;427(6970):159-64.
64. Michaels SD, Amasino RM. Loss of FLOWERING LOCUS C activity eliminates the late-flowering phenotype of FRIGIDA and autonomous pathway mutations but not responsiveness to vernalization. *The Plant Cell*. 2001;13(4):935-41.
65. Song G-q. Comparative transcriptome analysis of nonchilled, chilled, and late-pink bud reveals flowering pathway genes involved in chilling-mediated flowering in blueberry. *BMC plant biology*. 2018;v. 18(no. 1):pp. 98--2018 v.18 no.1. doi: 10.1186/s12870-018-1311-8. PubMed PMID: 5967338.
66. Cheng XF, Wang ZY. Overexpression of COL9, a CONSTANS-LIKE gene, delays flowering by reducing expression of CO and FT in *Arabidopsis thaliana*. *The Plant Journal*. 2005;43(5):758-68.
67. Chaurasia AK, Patil HB, Azeez A, Subramaniam VR, Krishna B, Sane AP, et al. Molecular characterization of CONSTANS-Like (COL) genes in banana (*Musa acuminata* L. AAA Group, cv. Grand Nain). *Physiology and Molecular Biology of Plants*. 2016;22(1):1-15.
68. Gray WM. Hormonal regulation of plant growth and development. *PLoS Biol*. 2004;2(9):E311-E. Epub 09/14. doi: 10.1371/journal.pbio.0020311. PubMed PMID: 15367944.
69. Vishwakarma A, Tetali SD, Selinski J, Scheibe R, Padmasree K. Importance of the alternative oxidase (AOX) pathway in regulating cellular redox and ROS homeostasis to optimize photosynthesis during restriction of the cytochrome oxidase pathway in *Arabidopsis thaliana*. *Annals of botany*. 2015;116(4):555-69.
70. Phartiyal P, Kim W-S, Cahoon RE, Jez JM, Krishnan HB. Soybean ATP sulfurylase, a homodimeric enzyme involved in sulfur assimilation, is abundantly expressed in roots and induced by cold treatment. *Archives of Biochemistry and Biophysics*. 2006;450(1):20-9.
71. Prioretti L, Gontero B, Hell R, Giordano M. Diversity and regulation of ATP sulfurylase in photosynthetic organisms. *Front Plant Sci*. 2014;5:597-. doi: 10.3389/fpls.2014.00597. PubMed PMID: 25414712.
72. Oracz K, El-Maarouf-Bouteau H, Kranner I, Bogatek R, Corbineau F, Bailly C. The Mechanisms Involved in Seed Dormancy Alleviation by Hydrogen Cyanide Unravel the Role of Reactive Oxygen Species as Key Factors of Cellular Signaling during Germination. *Plant Physiology*. 2009;150(1):494-505. doi: 10.1104/pp.109.138107.
73. Jiménez S, Lawton-Rauh AL, Reighard GL, Abbott AG, Bielenberg DG. Phylogenetic analysis and molecular evolution of the dormancy associated MADS-box genes from peach. *BMC Plant Biology*. 2009;9(1):81.
74. Zucoloto M, Antonioli LR, Siqueira DL, Czermainski ABC, Salomão LCC. Conditioning temperature for inducing uniform ripening of Abate Fetel'pears. *Revista Ciência Agronômica*. 2016;47(2):344-50.
75. Val J, Monge E, Blanco A, Espada J, editors. The effects of Ca applications on peach fruit mineral content and quality. VI International Symposium on Mineral Nutrition of Fruit Crops 868; 2008.
76. Gasic K, Hernandez A, Korban S. RNA extraction from different apple tissues rich in polyphenols and polysaccharides for cDNA library construction. *Plant Molecular Biology Reporter*. 2004;22(4):437-8. doi: 10.1007/bf02772687.
77. Sharpe R, Gustafson L, Hewitt S, Kilian B, Crabb J, Hendrickson C, et al. Concomitant phytonutrient and transcriptome analysis of mature fruit and leaf tissues of tomato (*Solanum*

lycopersicum L. cv. Oregon Spring) grown using organic and conventional fertilizer. bioRxiv. 2019:755769.

78. Bielsa Pérez B, Hewitt S, Reyes Chin-Wo S, Dhingra A, Rubio Cabetas MJ. Identification of water use efficiency related genes in ‘Garnem’ almond-peach rootstock using time-course transcriptome analysis. 2018.
79. Mortazavi A, Williams BA, McCue K, Schaeffer L, Wold B. Mapping and quantifying mammalian transcriptomes by RNA-Seq. *Nat Methods*. 2008;5. doi: 10.1038/nmeth.1226.
80. Conesa A, Gotz S, Garcia-Gomez JM, Terol J, Talon M, Robles M. Blast2GO: a universal tool for annotation, visualization and analysis in functional genomics research. *Bioinformatics*. 2005;21. doi: 10.1093/bioinformatics/bti610.
81. T O’Neil S, Emrich SJ. Assessing De Novo transcriptome assembly metrics for consistency and utility. *Bmc Genomics*. 2013;14(1):465.
82. Conesa A, Nueda MJ, Ferrer A, Talón M. maSigPro: a method to identify significantly differential expression profiles in time-course microarray experiments. *Bioinformatics*. 2006;22(9):1096-102.
83. Nueda MJ, Tarazona S, Conesa A. Next maSigPro: updating maSigPro bioconductor package for RNA-seq time series. *Bioinformatics*. 2014:btu333.
84. Ruijter J, Ramakers C, Hoogaars W, Karlen Y, Bakker O, Van den Hoff M, et al. Amplification efficiency: linking baseline and bias in the analysis of quantitative PCR data. *Nucleic acids research*. 2009;37(6):e45-e.
85. Ramakers C, Ruijter JM, Deprez RHL, Moorman AFM. Assumption-free analysis of quantitative real-time polymerase chain reaction (PCR) data. *Neuroscience Letters*. 2003;339(1):62-6. doi: [http://dx.doi.org/10.1016/S0304-3940\(02\)01423-4](http://dx.doi.org/10.1016/S0304-3940(02)01423-4).
